# Supplementary material for: Molecular modeling and synthesis of some new 2-imino-4-thiazolidinone derivatives with promising TNF-α inhibitory activity
Source: Royal Society of Chemistry journal article supplement (doi:10.1039/c5nj00078e), 2015-11-26
Supplement: c5nj00078e1.pdf [file c5nj00078e1.pdf]

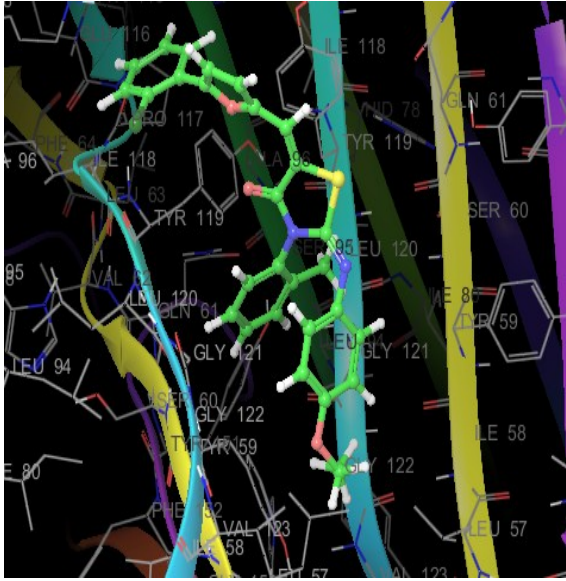

**1c:** Compound 2f

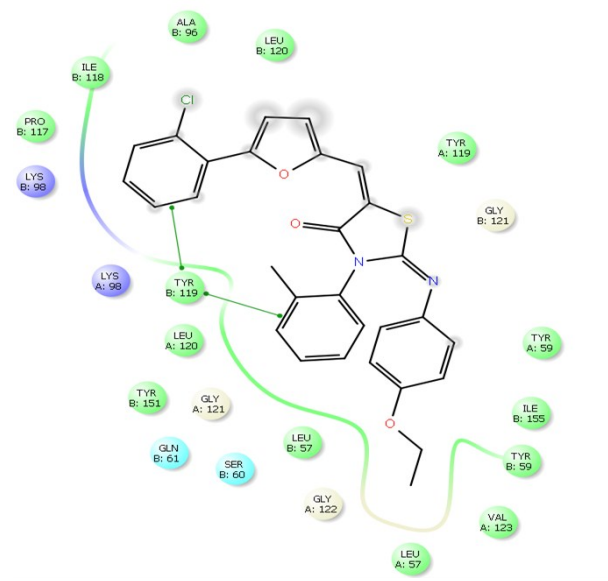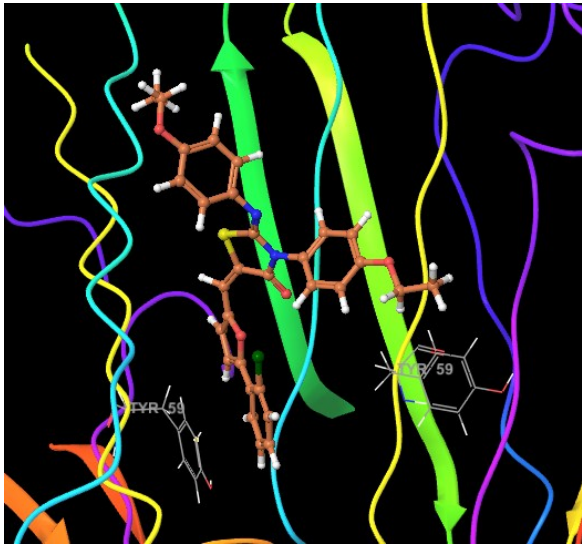

**1d:** Compounds 2h

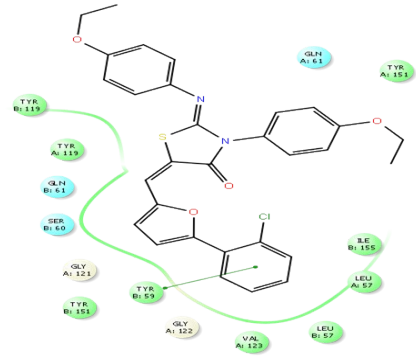

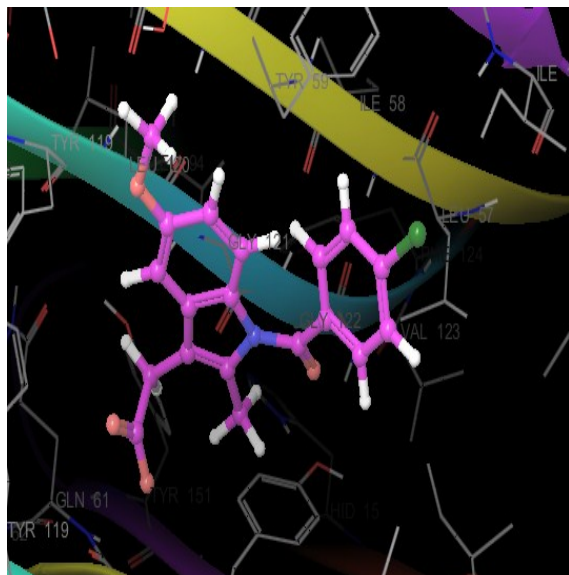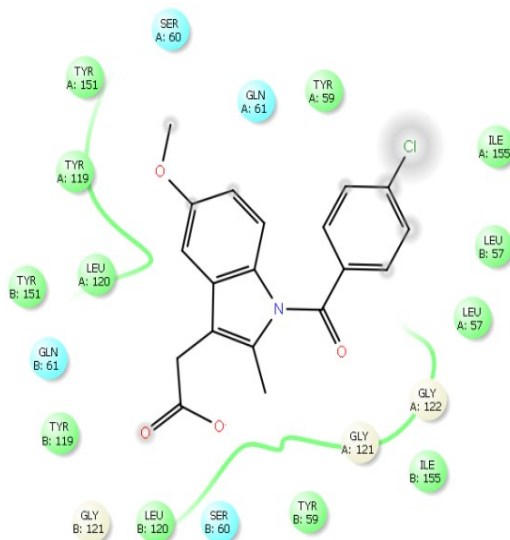

**1e:** Standard drug (Indomethacin)

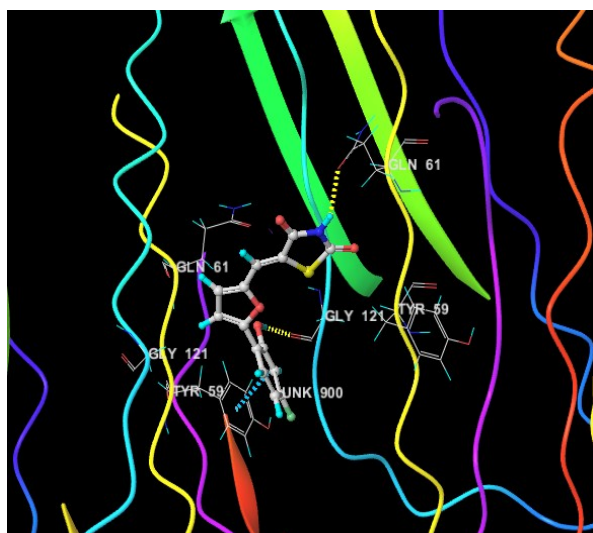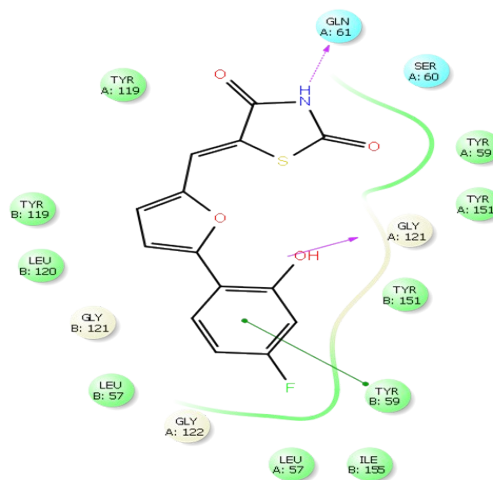

**1f:** Reference compound (V)

**Figure S2** Histopathology of rat stomach in Albino Wistar rats, photomicrographs (20X) of stomach wall of the animal groups administered with compound **3g**, **3f**, **3p**, **3o**, standard drug indomethacin and control group respectively.

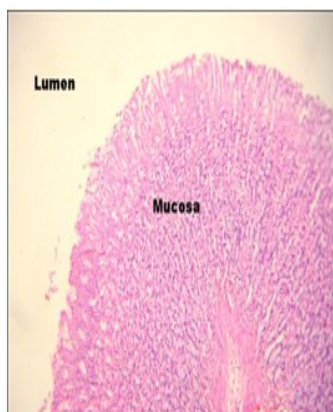

**3g (10x)**

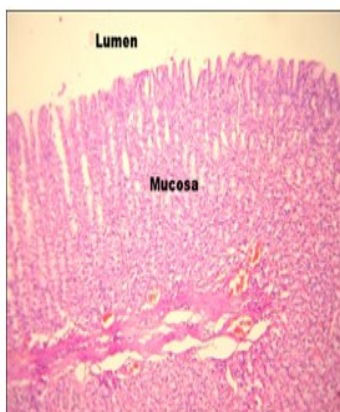

**3f (10x)**

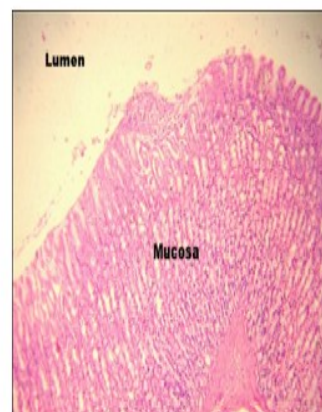

**3p (10x)**

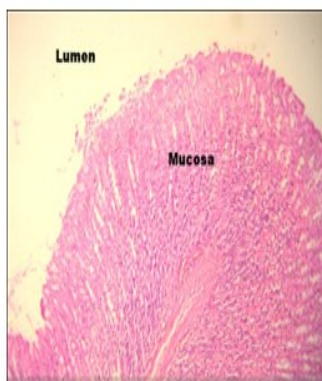

**3o (10x)**

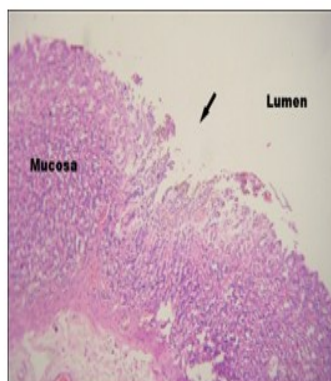

**Standard (10x)**

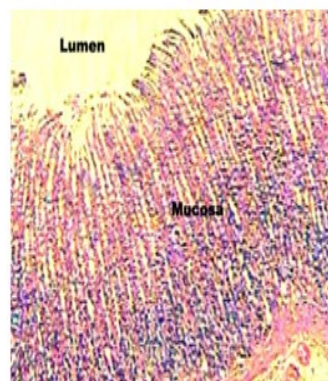

**Control (10x)**
